# Supplementary material for: Sequential role of RAD51 paralog complexes in replication fork remodeling and restart
Source: PubMed Central journal article supplement (PMC7363682; doi:10.1038/s41467-020-17324-z), 2020-07-15
Supplement: 41467_2020_17324_MOESM3_ESM.pdf [file 41467_2020_17324_MOESM3_ESM.pdf]

## **Description of Additional Supplementary Files**

File Name: Supplementary Data 1

Description: z-score based on RAD51 foci counts in S-phase cells

File Name: Supplementary Data 2

Description: Average number of RAD51 foci for each siRNA in S-phase cells
