# Supplementary material for: Sequential role of RAD51 paralog complexes in replication fork remodeling and restart
Source: PubMed Central journal article supplement (PMC7363682; doi:10.1038/s41467-020-17324-z), 2020-07-15
Supplement: 41467_2020_17324_MOESM6_ESM.pdf [file 41467_2020_17324_MOESM6_ESM.pdf]

## Reporting Summary

Nature Research wishes to improve the reproducibility of the work that we publish. This form provides structure for consistency and transparency in reporting. For further information on Nature Research policies, see our [Editorial Policies](#) and the [Editorial Policy Checklist](#).

### Statistics

For all statistical analyses, confirm that the following items are present in the figure legend, table legend, main text, or Methods section.

n/a Confirmed

- |                                     |                                     |                                                                                                                                                                                                                                                            |
|-------------------------------------|-------------------------------------|------------------------------------------------------------------------------------------------------------------------------------------------------------------------------------------------------------------------------------------------------------|
| <input type="checkbox"/>            | <input checked="" type="checkbox"/> | The exact sample size ( $n$ ) for each experimental group/condition, given as a discrete number and unit of measurement                                                                                                                                    |
| <input type="checkbox"/>            | <input checked="" type="checkbox"/> | A statement on whether measurements were taken from distinct samples or whether the same sample was measured repeatedly                                                                                                                                    |
| <input type="checkbox"/>            | <input checked="" type="checkbox"/> | The statistical test(s) used AND whether they are one- or two-sided<br><i>Only common tests should be described solely by name; describe more complex techniques in the Methods section.</i>                                                               |
| <input checked="" type="checkbox"/> | <input type="checkbox"/>            | A description of all covariates tested                                                                                                                                                                                                                     |
| <input type="checkbox"/>            | <input checked="" type="checkbox"/> | A description of any assumptions or corrections, such as tests of normality and adjustment for multiple comparisons                                                                                                                                        |
| <input type="checkbox"/>            | <input checked="" type="checkbox"/> | A full description of the statistical parameters including central tendency (e.g. means) or other basic estimates (e.g. regression coefficient) AND variation (e.g. standard deviation) or associated estimates of uncertainty (e.g. confidence intervals) |
| <input type="checkbox"/>            | <input checked="" type="checkbox"/> | For null hypothesis testing, the test statistic (e.g. $F$ , $t$ , $r$ ) with confidence intervals, effect sizes, degrees of freedom and $P$ value noted<br><i>Give <math>P</math> values as exact values whenever suitable.</i>                            |
| <input checked="" type="checkbox"/> | <input type="checkbox"/>            | For Bayesian analysis, information on the choice of priors and Markov chain Monte Carlo settings                                                                                                                                                           |
| <input checked="" type="checkbox"/> | <input type="checkbox"/>            | For hierarchical and complex designs, identification of the appropriate level for tests and full reporting of outcomes                                                                                                                                     |
| <input checked="" type="checkbox"/> | <input type="checkbox"/>            | Estimates of effect sizes (e.g. Cohen's $d$ , Pearson's $r$ ), indicating how they were calculated                                                                                                                                                         |

*Our web collection on [statistics for biologists](#) contains articles on many of the points above.*

### Software and code

Policy information about [availability of computer code](#)

Data collection QIBC data: Olympus ScanR Image Analysis Software version 3.0.0; Electron microscopy: DigitalMicrograph Version 1.83.842 (Gatan, Inc.); Metaphase acquisition: Leica Application Suite X 3.6.0.20104; DNA fiber imaging:

Data analysis Color-coded scatterplots: Spotfire data visualization software version 7.0.1 (TIBCO); DNA fiber, EM and metaphase image analysis: ImageJ software64; Graph Pad Prim version 7 for statistical analysis of numerical data.

For manuscripts utilizing custom algorithms or software that are central to the research but not yet described in published literature, software must be made available to editors and reviewers. We strongly encourage code deposition in a community repository (e.g. GitHub). See the Nature Research [guidelines for submitting code & software](#) for further information.

### Data

Policy information about [availability of data](#)

All manuscripts must include a [data availability statement](#). This statement should provide the following information, where applicable:

- Accession codes, unique identifiers, or web links for publicly available datasets
- A list of figures that have associated raw data
- A description of any restrictions on data availability

Source data underlying Figures 1a-h; 2b-g; 3a-d; 4a-d; 5a; S1a+d; S2a-e; S3a-c; S4a-f are provided in the source data file. All other original microscopy images will be made available upon reasonable request.

## Field-specific reporting

Please select the one below that is the best fit for your research. If you are not sure, read the appropriate sections before making your selection.

Life sciences  Behavioural & social sciences  Ecological, evolutionary & environmental sciences

For a reference copy of the document with all sections, see [nature.com/documents/nr-reporting-summary-flat.pdf](https://www.nature.com/documents/nr-reporting-summary-flat.pdf)

## Life sciences study design

All studies must disclose on these points even when the disclosure is negative.

|                 |                                                                                                                                                                                                                                                                                                                                                                                                                                                                                                                                                                     |
|-----------------|---------------------------------------------------------------------------------------------------------------------------------------------------------------------------------------------------------------------------------------------------------------------------------------------------------------------------------------------------------------------------------------------------------------------------------------------------------------------------------------------------------------------------------------------------------------------|
| Sample size     | Sample size for all experiments shown (electron microscopy, n>70 in 3 independent experiments; DNA fibers, n>150 in 2 or more independent experiments; metaphase spreads, n>50 in 3 independent experiments) was chosen to obtain statistical power, in conformity to accepted standard sample size in a number of previous publications using these approaches:<br><br>Mijic et al., Nat Commun., DOI: 10.1038/s41467-017-01164-5<br>Vujanovic et al., Mol Cell, DOI: 10.1016/j.molcel.2017.08.010<br>Mutreja et al., Cell Rep., DOI: 10.1016/j.celrep.2018.08.019 |
| Data exclusions | No data were excluded from the analysis.                                                                                                                                                                                                                                                                                                                                                                                                                                                                                                                            |
| Replication     | For all experiments, the number of biological replicates is indicated and, without any exception, reproduced the representative data shown in the figures.                                                                                                                                                                                                                                                                                                                                                                                                          |
| Randomization   | We were working with asynchronously cycling cell populations or individual DNA replication molecules from these cell populations, hence further randomization was not necessary for our approaches.                                                                                                                                                                                                                                                                                                                                                                 |
| Blinding        | Individual repetitions for Metaphase Spreading, DNA fiber analysis and Electron Microscopy were blinded to the investigators. For the automated QIBC screen blinding was not necessary due to its intrinsically unbiased nature.                                                                                                                                                                                                                                                                                                                                    |

## Reporting for specific materials, systems and methods

We require information from authors about some types of materials, experimental systems and methods used in many studies. Here, indicate whether each material, system or method listed is relevant to your study. If you are not sure if a list item applies to your research, read the appropriate section before selecting a response.

### Materials & experimental systems

| n/a                                 | Involved in the study                                     |
|-------------------------------------|-----------------------------------------------------------|
| <input type="checkbox"/>            | <input checked="" type="checkbox"/> Antibodies            |
| <input type="checkbox"/>            | <input checked="" type="checkbox"/> Eukaryotic cell lines |
| <input checked="" type="checkbox"/> | <input type="checkbox"/> Palaeontology and archaeology    |
| <input checked="" type="checkbox"/> | <input type="checkbox"/> Animals and other organisms      |
| <input checked="" type="checkbox"/> | <input type="checkbox"/> Human research participants      |
| <input checked="" type="checkbox"/> | <input type="checkbox"/> Clinical data                    |
| <input checked="" type="checkbox"/> | <input type="checkbox"/> Dual use research of concern     |

### Methods

| n/a                                 | Involved in the study                           |
|-------------------------------------|-------------------------------------------------|
| <input checked="" type="checkbox"/> | <input type="checkbox"/> ChIP-seq               |
| <input checked="" type="checkbox"/> | <input type="checkbox"/> Flow cytometry         |
| <input checked="" type="checkbox"/> | <input type="checkbox"/> MRI-based neuroimaging |

## Antibodies

|                 |                                                                                                                                                                                                                                                                                                                                                                                                                                                                                                                                                                                                                                                                                                                                                                                                        |
|-----------------|--------------------------------------------------------------------------------------------------------------------------------------------------------------------------------------------------------------------------------------------------------------------------------------------------------------------------------------------------------------------------------------------------------------------------------------------------------------------------------------------------------------------------------------------------------------------------------------------------------------------------------------------------------------------------------------------------------------------------------------------------------------------------------------------------------|
| Antibodies used | <p>Primary antibodies:<br/>RAD51B mouse (sc-377192, Santa Cruz Biotechnology); RAD51C rabbit (ab95069, Abcam); RAD51D rabbit (ab202063, Abcam); XRCC2 mouse (sc-365854, Santa Cruz Biotechnology); XRCC3 mouse (sc-271714, Santa Cruz Biotechnology); BRCA2 mouse (OP-95, EMD Millipore); RAD51 rabbit (Bioacademia 70-002); ZRANB3 rabbit (23111-1-AP, Proteintech); KU70 mouse (ab202022, Abcam); <math>\alpha</math>-Tubulin mouse (T9026, Sigma-Aldrich); Rabbit polyclonal RAD51 antibody (Bioacademia 70-002); CldU (ab6326, Abcam, rat); BrdU/IdU (347580, Becton Dickinson, mouse)</p> <p>Secondary antibodies:<br/>Cy3 donkey anti-rat (712-166-153, LubioScience); Alexa Fluor 488 goat anti-mouse (A11001, ThermoFisher); ECL anti-rabbit (NA934, Sigma); ECL anti-mouse (NA931, Sigma)</p> |
| Validation      | <p>All antibodies used in this study are commercially available (see catalog numbers above) and show the band of the expected size. In addition, the antibodies directed against the RAD51 paralogs, ZRANB3, BRCA2 and RAD51 were further validated for our approaches using an siRNA directed against the protein of interest and/ or the corresponding knock-out cell line. Validation experiments of the specificity for alpha-tubulin and Ku70 antibodies in western-blotting are displayed on the corresponding manufacturer's websites. The CldU antibody has been validated for immunofluorescence applications, as stated on the Abcam</p>                                                                                                                                                     |

website. The IdU (BrdU) antibody has been thoroughly validated and used since 1982, as proven by the long list of references provided on the manufacturer's website.

[https://www.sigmaaldrich.com/catalog/product/sigma/t9026?](https://www.sigmaaldrich.com/catalog/product/sigma/t9026?lang=de&region=CH&gclid=Cj0KCQjwn7j2BRDrARIsAHJkxmwhLjBkXGE_IUMFtTpAJtSnm3LU817Xleb29HObyX7uuawZhqaQ0CAaAqnYEALw_wcB)

[lang=de&region=CH&gclid=Cj0KCQjwn7j2BRDrARIsAHJkxmwhLjBkXGE\\_IUMFtTpAJtSnm3LU817Xleb29HObyX7uuawZhqaQ0CAaAqnYEALw\\_wcB](https://www.sigmaaldrich.com/catalog/product/sigma/t9026?lang=de&region=CH&gclid=Cj0KCQjwn7j2BRDrARIsAHJkxmwhLjBkXGE_IUMFtTpAJtSnm3LU817Xleb29HObyX7uuawZhqaQ0CAaAqnYEALw_wcB)

[https://www.abcam.com/ku70-antibody-2f7f5-ab202022.html#description\\_images\\_2](https://www.abcam.com/ku70-antibody-2f7f5-ab202022.html#description_images_2)

<https://www.abcam.com/brdu-antibody-bu175-icr1-proliferation-marker-ab6326.html>

<https://wwwbdbiosciences.com/us/applications/research/apoptosis/purified-antibodies/purified-mouse-anti-brdu-b44/p/347580>

## Eukaryotic cell lines

Policy information about [cell lines](#)

|                                                                   |                                                                                                                                                                                                                                                                        |
|-------------------------------------------------------------------|------------------------------------------------------------------------------------------------------------------------------------------------------------------------------------------------------------------------------------------------------------------------|
| Cell line source(s)                                               | Human U2OS (ATCC); hTERT-RPE1 (ATCC); ZRANB3 proficient and Knock-Out U2OS cells were kindly provided by Dr. David Cortez; RAD51 paralog CRISPR-Cas9-based Knock-Out U2OS cells have been generated and genetically characterized as recently reported (Reference 44). |
| Authentication                                                    | None of the cell lines were authenticated in house for this manuscript.                                                                                                                                                                                                |
| Mycoplasma contamination                                          | ZRANB3 cells and human U2OS cells have been tested negative for mycoplasma. hTERT-RPE1 and RAD51 cells have not been tested in our institute.                                                                                                                          |
| Commonly misidentified lines (See <a href="#">ICLAC</a> register) | No commonly misidentified lines were used in this study.                                                                                                                                                                                                               |
